# Supplementary material
Source: Springer Nature journal article supplement (https://mijn.bsl.nl/resource/supplementary/13047_2009_84_MOESM1_ESM.zip/7109550)

# Appendix 1: FOOTWEAR ASSESSMENT TOOL

## 1. FIT

Foot length

Thumb width

**Fit of shoe (length) – rule of thumb (wearer's thumb)**

Palpation:

good ☐

too short (< ½ thumb) ☐

too long (> 1 ½) ☐

Straw =

good ☐

too short (< ½ thumb) ☐

too long (> 1 ½) ☐

**Fit of shoe (width) – grasp test**

good ☐

too narrow ☐

too wide ☐

**Fit of shoe (depth)**

good ☐

too shallow ☐

## 2. GENERAL

**Age of shoe**

0 – 6 months ☐

6 – 12 months ☐

> 12 months ☐

**Footwear style**

walking shoe ☐

athletic shoe ☐

oxford shoe ☐

moccasin ☐

boot ☐

ugg-boot ☐

high heel ☐

Thong/flip-flop ☐

slipper ☐

backless slipper ☐

court shoe ☐

mule ☐

sandal ☐

surgical/bespoke ☐

other (specify)

**Materials (upper)**

leather ☐

synthetic ☐

mesh ☐

other

**Materials (outsole)**

rubber ☐

plastic ☐

leather ☐

other

**Weight**

**Length**

**Weight/length**

## 3. GENERAL STRUCTURE

**Heel height =**

0 – 2.5 cm ☐

2.6 – 5.0 cm ☐

> 5.0 cm ☐

**Forefoot height (measured at point of the 1<sup>st</sup> and MTPJs) =**

0 – 0.9 cm ☐

1.0 – 2.0 cm ☐

> 2.0 cm ☐

**Longitudinal profile (heel – forefoot difference) =**

flat (0 – 0.9 cm) ☐

small heel rise (1 – 3 cm) ☐

large heel rise (> 3 cm) ☐

**Last (centre goniometer at 50% shoe length) =**

straight (< 5°) ☐

semi-curved (5 – 15°) ☐

curved (> 15°) ☐

**Fixation of upper to sole**

board ☐

combination ☐

slip-lasted ☐

**Forefoot sole flexion point**

at level of MTPJs ☐

proximal to 1st MTPJ ☐

distal to 1st MTPJ ☐

#### 4. MOTION CONTROL PROPERTIES

**Density** single ☐ dual ☐

**Fixation** none ☐ laces ☐ straps/buckles ☐ Velcro ☐ zips ☐  
Number of eyelets ☐

**Heel counter stiffness (20mm above bottom or upper)**

no heel counter ☐ minimal ( $> 45^\circ$ ) ☐ moderate ( $< 45^\circ$ ) ☐ rigid (0-10°) ☐

**Midfoot sole sagittal stability**

minimal ( $> 45^\circ$ ) ☐ moderate ( $< 45^\circ$ ) ☐ rigid (0-10°) ☐

**Midfoot sole frontal stability (torsional)**

minimal ( $> 45^\circ$ ) ☐ moderate ( $< 45^\circ$ ) ☐ rigid (0-10°) ☐

#### 5. CUSHIONING

**Presence** none ☐ heel ☐ heel/forefoot ☐

**Lateral Midsole hardness**

Durometer readings

|                 |                      |                 |                      |                 |                      |      |                      |
|-----------------|----------------------|-----------------|----------------------|-----------------|----------------------|------|----------------------|
| soft            | <input type="text"/> | firm            | <input type="text"/> | hard            | <input type="text"/> | mean | <input type="text"/> |
| 1 <sup>st</sup> | <input type="text"/> | 2 <sup>nd</sup> | <input type="text"/> | 3 <sup>rd</sup> | <input type="text"/> |      |                      |

**Medial Midsole hardness**

Durometer readings

|                 |                      |                 |                      |                 |                      |      |                      |
|-----------------|----------------------|-----------------|----------------------|-----------------|----------------------|------|----------------------|
| soft            | <input type="text"/> | firm            | <input type="text"/> | hard            | <input type="text"/> | mean | <input type="text"/> |
| 1 <sup>st</sup> | <input type="text"/> | 2 <sup>nd</sup> | <input type="text"/> | 3 <sup>rd</sup> | <input type="text"/> |      |                      |

**Heel sole hardness (centre of inside heel shoe interface)**

Durometer readings

|                 |                      |                 |                      |                 |                      |      |                      |
|-----------------|----------------------|-----------------|----------------------|-----------------|----------------------|------|----------------------|
| soft            | <input type="text"/> | firm            | <input type="text"/> | hard            | <input type="text"/> | mean | <input type="text"/> |
| 1 <sup>st</sup> | <input type="text"/> | 2 <sup>nd</sup> | <input type="text"/> | 3 <sup>rd</sup> | <input type="text"/> |      |                      |

#### 6. WEAR PATTERNS

**Upper** medial tilt ( $> 10^\circ$ ) ☐ neutral ☐ lateral tilt ( $> 10^\circ$ ) ☐

**Midsole** medial compression signs ☐ neutral ☐ lateral compression signs ☐

**Tread pattern** **A** textured ☐ smooth (i.e. no pattern) ☐  
**B** not worn ☐ partly worn ☐ fully worn ☐

**Outsole wear pattern** none ☐ normal ☐ lateral ☐ medial ☐

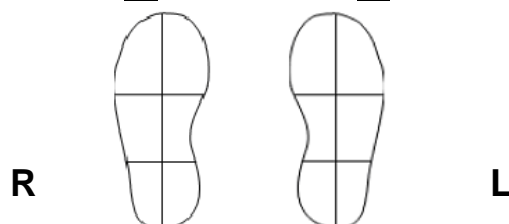

Supplement: MOESM1 [file 7109550]
