# Supplementary material
Source: Springer Nature journal article supplement (https://mijn.bsl.nl/resource/supplementary/13047_2009_84_MOESM1_ESM.zip/7109550)
Supplement: MOESM1 [file 7109550]

MOTION CONTROL PROPERTIES SCALE

| Item                        | Score           |                                                      |              |                            |
|-----------------------------|-----------------|------------------------------------------------------|--------------|----------------------------|
|                             | 0               | 1                                                    | 2            | 3                          |
| Midsole density layers      | Single density  |                                                      | Dual density |                            |
| Fixation (upper to foot)    | None            | Alternative to laces (e.g. strap, Velcro, zip, etc.) |              | Laces (at least 3 eyelets) |
| Heel counter stiffness      | No heel counter | Minimal                                              | Moderate     | Rigid                      |
| Midfoot sagittal stability  | Minimal         | Moderate                                             | Rigid        |                            |
| Midfoot torsional stability | Minimal         | Moderate                                             | Rigid        |                            |
