# Supplementary material
Source: Springer Nature journal article supplement (https://mijn.bsl.nl/resource/supplementary/13047_2009_84_MOESM1_ESM.zip/7109550)

**Walking shoe**

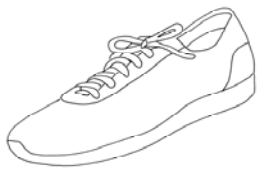

**Athletic shoe /  
Runner**

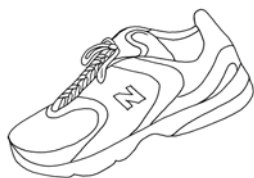

**Oxford shoe**

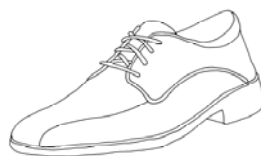

**Moccassin**

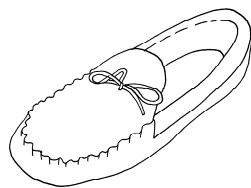

**Boot**

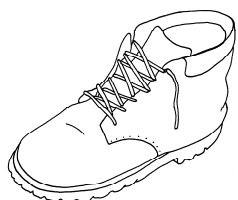

**Ugg boot**

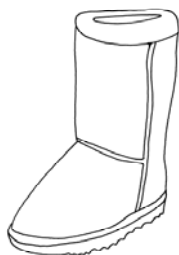

**High heel /  
Stiletto**

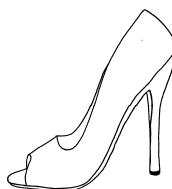

**Thong / Flip flop**

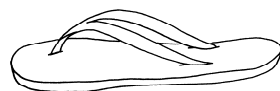

**Slipper**

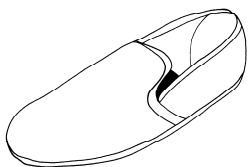

**Backless slipper**

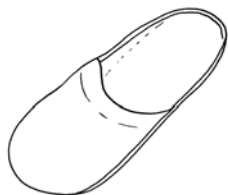

**Court shoe**

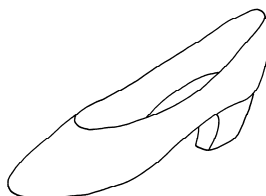

**Mule**

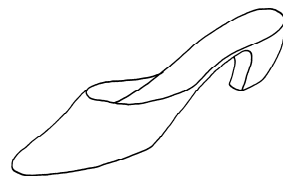

**Sandal**

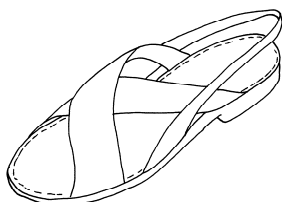

**Surgical /  
Bespoke  
footwear**

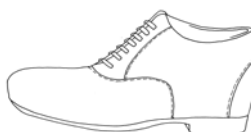

Supplement: MOESM1 [file 7109550]
